# Supplementary material for: Morphometric Patterns and Blood Biochemistry of Capybaras (Hydrochoerus hydrochaeris) from Human-Modified Landscapes and Natural Landscapes in Brazil
Source: MDPI journal article supplement (doi:10.3390/vetsci8080165), 2021-08-13
Supplement: s1 [file s1]

**Supplementary Table S1.** Results of regression analysis between the Body Condition Index (BCI: BM / TL)\* and biochemical parameters among adult capybaras (animals from human-modified and natural landscapes were all analyzed together).

| Parameters                       | Regression equation               | R <sup>2</sup> (%) | P value |
|----------------------------------|-----------------------------------|--------------------|---------|
| Fructosamine (Fru)               | Fru (mmol/L) = 174.4 + 17.52 BCI  | 0.07               | 0.858   |
| Total protein (TP)               | TP (g/dL) = 6.151 + 0.102 BCI     | 0.02               | 0.930   |
| Aspartate aminotransferase (AST) | AST (U/L) = 97.99 - 144.8 BCI     | 12.70              | 0.013   |
| Alkaline phosphatase (ALP)       | ALP (U/L) = 304.8 - 279.2 BCI     | 5.78               | 0.152   |
| Creatine kinase (CK)             | CK (U/L) = 9450 - 16954 BCI       | 5.34               | 0.114   |
| Urea (Ur)                        | Ur (mg/dL) = 47.33 - 30.93 BCI    | 1.88               | 0.353   |
| Calcium (Ca)                     | Ca (mg/dL) = 9.032 + 2.703 BCI    | 4.10               | 0.168   |
| Phosphorous (P)                  | P (mg/dL) = 9.537 - 7.817 BCI     | 8.22               | 0.048   |
| Cholesterol (Cho)                | Cho (mg/dL) = 23.86 + 50.37 BCI   | 7.12               | 0.067   |
| Triglycerides (Tri)              | Tri (mg/dL) = - 149.2 + 506.1 BCI | 11.18              | 0.020   |
| Albumin (Alb)                    | Alb (g/dL) = 3.076 - 0.6885 BCI   | 1.78               | 0.367   |

\* BM / TL: Body mass (BM) divided by total length (TL)

**Supplementary Table S2.** Results of regression analysis between the Body Condition Index (BCI:  $BM / TL^2$ )\* and biochemical parameters among adult capybaras (animals from human-modified and natural landscapes were all analyzed together).

| Parameters                       | Regression equation             | R <sup>2</sup> (%) | P value |
|----------------------------------|---------------------------------|--------------------|---------|
| Fructosamine (Fru)               | Fru (mmol/L) = 186.7 - 1033 BCI | 0.01               | 0.951   |
| Total protein (TP)               | TP (g/dL) = 6.481 - 75.1 BCI    | 0.32               | 0.702   |
| Aspartate aminotransferase (AST) | AST (U/L) = 122.8 - 25303 BCI   | 13.28              | 0.011   |
| Alkaline phosphatase (ALP)       | ALP (U/L) = 271.9 - 26916 BCI   | 1.80               | 0.428   |
| Creatine kinase (CK)             | CK (U/L) = 13595 - 3293030 BCI  | 6.89               | 0.071   |
| Urea (Ur)                        | Ur (mg/dL) = 52.38 - 5335 BCI   | 1.91               | 0.349   |
| Calcium (Ca)                     | Ca (mg/dL) = 8.347 + 531.7 BCI  | 5.43               | 0.111   |
| Phosphorous (P)                  | P (mg/dL) = 11.74 - 1596 BCI    | 11.73              | 0.017   |
| Cholesterol (Cho)                | Cho (mg/dL) = 12.73 + 9465 BCI  | 8.61               | 0.043   |
| Triglycerides (Tri)              | Tri (mg/dL) = 216.9 + 83310 BCI | 10.35              | 0.026   |
| Albumin (Alb)                    | Alb (g/dL) = 3.009 - 70.8 BCI   | 0.64               | 0.588   |

\*  $BM / TL^2$ : Body mass (BM) divided by the square of the total length ( $TL^2$ )

**Supplementary Table S3.** Results of regression analysis between the Body Condition Index (BCI:  $BM / TL^3$ )\* and biochemical parameters among adult capybaras (animals from human-modified and natural landscapes were all analyzed together).

| Parameters                       | Regression equation                 | R <sup>2</sup> (%) | P value |
|----------------------------------|-------------------------------------|--------------------|---------|
| Fructosamine (Fru)               | Fru (mmol/L) = 214,6 - 1089559 BCI  | 0.49               | 0.637   |
| Total protein (TP)               | TP (g/dL) = 7,007 - 27660 BCI       | 2.29               | 0.305   |
| Aspartate aminotransferase (AST) | AST (U/L) = 105,8 - 2659652 BCI     | 7.71               | 0.056   |
| Alkaline phosphatase (ALP)       | ALP (U/L) = 110,5 + 2106790 BCI     | 0.49               | 0.680   |
| Creatine kinase (CK)             | CK (U/L) = 13414 - 4,16E+08 BCI     | 5.78               | 0.100   |
| Urea (Ur)                        | Ur (mg/dL) = 48,05 - 535233 BCI     | 1.01               | 0.496   |
| Calcium (Ca)                     | Ca (mg/dL) = 8,371 + 67297 BCI      | 4.57               | 0.144   |
| Phosphorous (P)                  | P (mg/dL) = 11,85 - 208188 BCI      | 10.49              | 0.025   |
| Cholesterol (Cho)                | Cho (mg/dL) = 15,30 + 1124839 BCI   | 6.39               | 0.083   |
| Triglycerides (Tri)              | Tri (mg/dL) = - 126,3 + 7567304 BCI | 4.49               | 0.148   |
| Albumin (Alb)                    | Alb (g/dL) = 2,676 + 2318 BCI       | 0.04               | 0.898   |

\*  $BM / TL^3$ : Body mass (BM) divided by the cube of the total length ( $TL^3$ )

**Supplementary Table S4.** Results of regression analysis between the Body Condition Index (BCI:  $\text{resBM} / \text{TL}^2$ )\* and biochemical parameters among adult capybaras (animals from human-modified and natural landscapes were all analyzed together).

| Parameters                       | Regression equation              | R <sup>2</sup> (%) | P value |
|----------------------------------|----------------------------------|--------------------|---------|
| Fructosamine (Fru)               | Fru (mmol/L) = 182.1 - 12385 BCI | 1.06               | 0.487   |
| Total protein (TP)               | TP (g/dL) = 6.184 - 258.3 BCI    | 3.35               | 0.213   |
| Aspartate aminotransferase (AST) | AST (U/L) = 26.90 - 21586 BCI    | 8.52               | 0.044   |
| Alkaline phosphatase (ALP)       | ALP (U/L) = 172.5 + 9313 BCI     | 0.17               | 0.809   |
| Creatine kinase (CK)             | CK (U/L) = 1074 - 3380168 BCI    | 6.40               | 0.083   |
| Urea (Ur)                        | Ur (mg/dL) = 32.16 - 4426 BCI    | 1.16               | 0.466   |
| Calcium (Ca)                     | Ca (mg/dL) = 10.37 + 545.5 BCI   | 5.04               | 0.125   |
| Phosphorous (P)                  | P (mg/dL) = 5.671 - 1611 BCI     | 10.54              | 0.024   |
| Cholesterol (Cho)                | Cho (mg/dL) = 48.71 + 9591 BCI   | 7.79               | 0.055   |
| Triglycerides (Tri)              | Tri (mg/dL) = 98.48 + 63581 BCI  | 5.31               | 0.115   |
| Albumin (Alb)                    | Alb (g/dL) = 2.745 + 20.9 BCI    | 0.05               | 0.881   |

\*  $\text{resBM} / \text{TL}^2$ : Residual of linear regression of body mass (resBM) divided by the square of total length ( $\text{TL}^2$ )

**Supplementary Table S5.** Results of regression analysis between the Body Condition Index (BCI:  $\text{resBM} / \text{TL}^3$ )\* and biochemical parameters among adult capybaras (animals from human-modified and natural landscapes were all analyzed together).

| Parameters                       | Regression equation                | R <sup>2</sup> (%) | P value |
|----------------------------------|------------------------------------|--------------------|---------|
| Fructosamine (Fru)               | Fru (mmol/L) = 182.2 - 1632520 BCI | 1.11               | 0.477   |
| Total protein (TP)               | TP (g/dL) = 6.186 - 32545 BCI      | 3.21               | 0.223   |
| Aspartate aminotransferase (AST) | AST (U/L) = 26.99 - 2926483 BCI    | 9.45               | 0.034   |
| Alkaline phosphatase (ALP)       | ALP (U/L) = 172.6 + 1537157 BCI    | 0.28               | 0.756   |
| Creatine kinase (CK)             | CK (U/L) = 1086 - 4.62E+08 BCI     | 7.21               | 0.065   |
| Urea (Ur)                        | Ur (mg/dL) = 32.18 - 589569 BCI    | 1.24               | 0.451   |
| Calcium (Ca)                     | Ca (mg/dL) = 10.36 + 69404 BCI     | 4.92               | 0.130   |
| Phosphorous (P)                  | P (mg/dL) = 5.685 - 202737 BCI     | 10.08              | 0.028   |
| Cholesterol (Cho)                | Cho (mg/dL) = 48.62 + 1180570 BCI  | 7.13               | 0.067   |
| Triglycerides (Tri)              | Tri (mg/dL) = 97.87 + 7824816 BCI  | 4.86               | 0.132   |
| Albumin (Alb)                    | Alb (g/dL) = 2.744 + 980 BCI       | 0.01               | 0.956   |

\*  $\text{resBM} / \text{TL}^3$ : Residual of the linear regression of the body mass (resBM) divided by the cube of the total length ( $\text{TL}^3$ )
